# Supplementary material for: Using AlphaFold-Multimer to study novel protein-protein interactions of predation essential hypothetical proteins in Bdellovibrio
Source: Frontiers journal article supplement (doi:10.3389/fbinf.2025.1566486), 2025-04-14
Supplement: Data_Sheet_4.pdf [file Data_Sheet_4.pdf]

## Supplementary 5

### 3D homology search using Foldseek

#### CATH50 (Class, Architecture, Topology, and Homologous superfamily Database)

TM-Score: 0.78372  
RMSD: 1.37

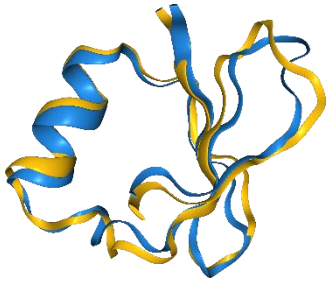

UniProt: O36025 381-458  
GYF domain  
(*Schizosaccharomyces pombe*)

TM-Score: 0.71837  
RMSD: 2.68

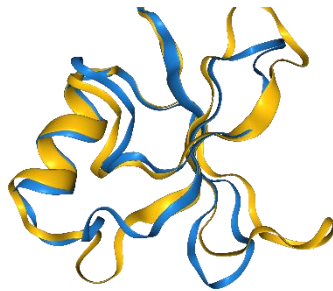

UniProt: O95400  
GYF domain  
(*Homo sapiens*)

TM-Score: 0.68333  
RMSD: 3.58

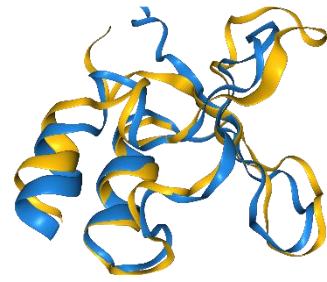

UniProt: Q0D8Q3  
GYF domain  
(*Oryza sativa*)

#### AFDB50 (AlphaFold Protein Structure Database)

TM-Score: 0.88263  
RMSD: 1.13

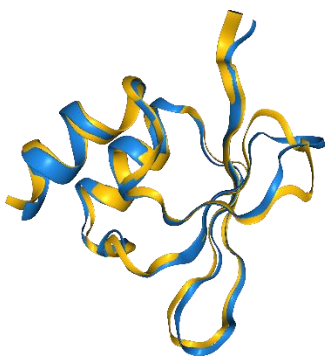

UniProt: A0A382EVS8  
GYF\_2 domain-containing protein  
(marine metagenome)

TM-Score: 0.83602  
RMSD: 1.91

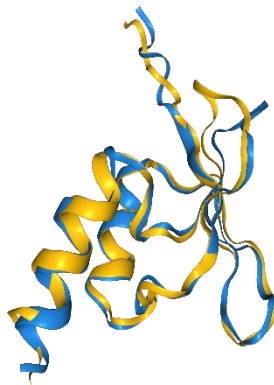

UniProt: A0A383AJS8  
Cyclic nucleotide-binding domain  
(marine metagenome)

TM-Score: 0.84311  
RMSD: 2.73

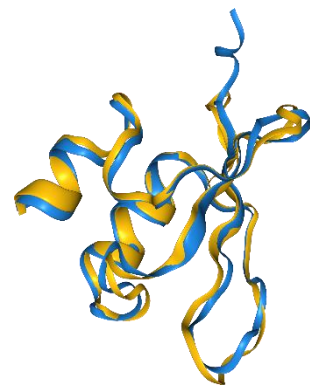

UniProt: A0A2N2IH23  
FHA domain containing protein  
(*Deltaproteobacteria*)

### AFDB-PROTEOME (AlphaFold Database-PROTEOME)

TM-Score: 0.71138  
RMSD: 2.43

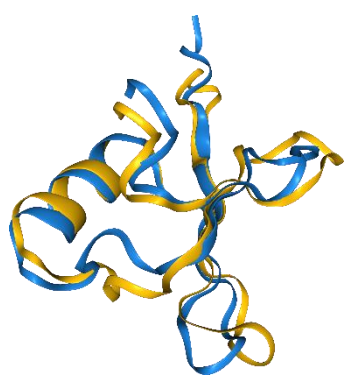

UniProt: Q9NAH3  
Tumorous Enhancer of Glp-1(Gf)  
(*Caenorhabditis elegans*)

TM-Score: 0.72559  
RMSD: 2.67

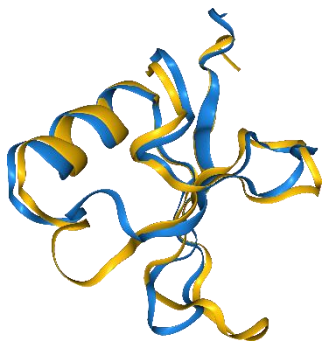

UniProt: A0A044V700  
GYF domain-containing protein  
(*Onchocerca volvulus*)

TM-Score: 0.63097  
RMSD: 11.94

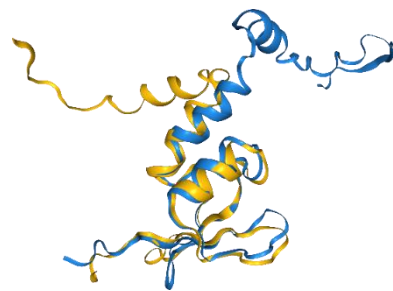

UniProt: C0HP9  
RNA-binding protein, putative  
(*Plasmodium falciparum* 3D7)

### BFVD (Big Fantastic Virus Database)

TM-Score: 0.72467  
RMSD: 2.66

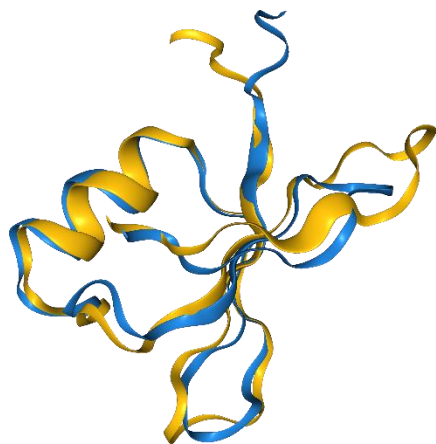

UniProt: Q4A2R6  
Uncharacterized protein  
(*Coccolithovirus*)

TM-Score: 0.61346  
RMSD: 3.11

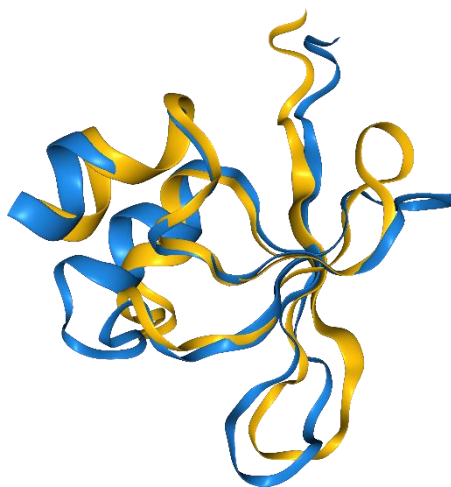

UniProt: U5XK58  
Uncharacterized protein  
(*Phormidium* phage MIS-PhV1B)

TM-Score: 0.4673  
RMSD: 16.77

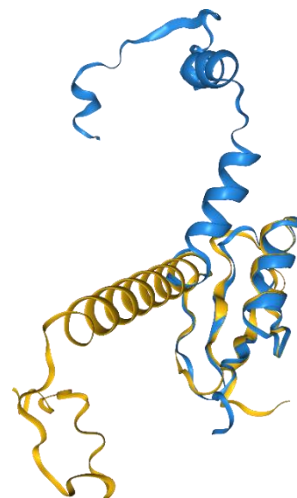

UniProt: A0A8S5T7N5  
GYF domain 2  
(*Myoviridae* sp. cta6i12)

Figure. Showing 3D homology hits with their respective TM and RMSD scores from four databases within Foldseek. Query protein, Bd0075A-domain is shown in blue while corresponding portions of the hit proteins are shown in yellow. UniProt accession numbers and the name of the organisms where the hit proteins can be found are provided respectively.

### Structural similarity of the Bd2209-Bd2212 complex to the Bd2723-Bd2726 complex

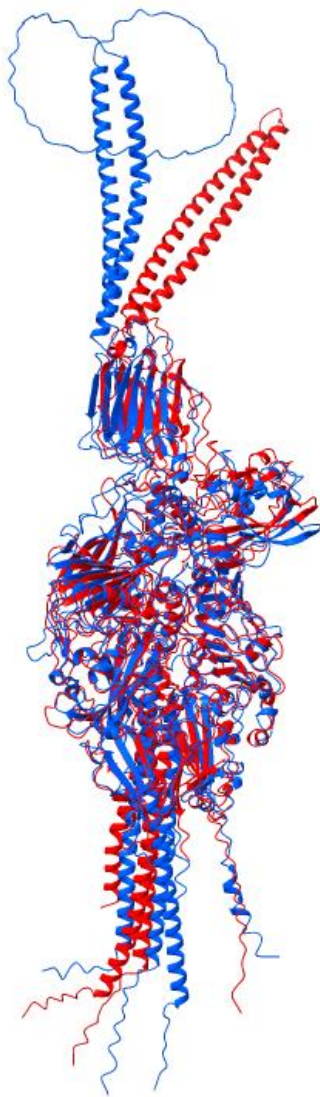

Aligned length= 1634, RMSD= 4.17 Å,

TM-score= 0.80356 (normalized by length of  
Bd2209-Bd2212 complex: Length=1890, d0=13.49)

TM-score= 0.85455 (normalized by length of  
Bd2723-Bd2726: Length=1772, d0=13.16)

Figure. Superimposed structure of Bd2209-Bd2212 complex (Blue) and Bd2723-Bd2726 complex (Red). TM-score =0.80356, RMSD = 4.17 Å

## AlphaFold multimer model of the Interaction between Bd0075 and Bd0474

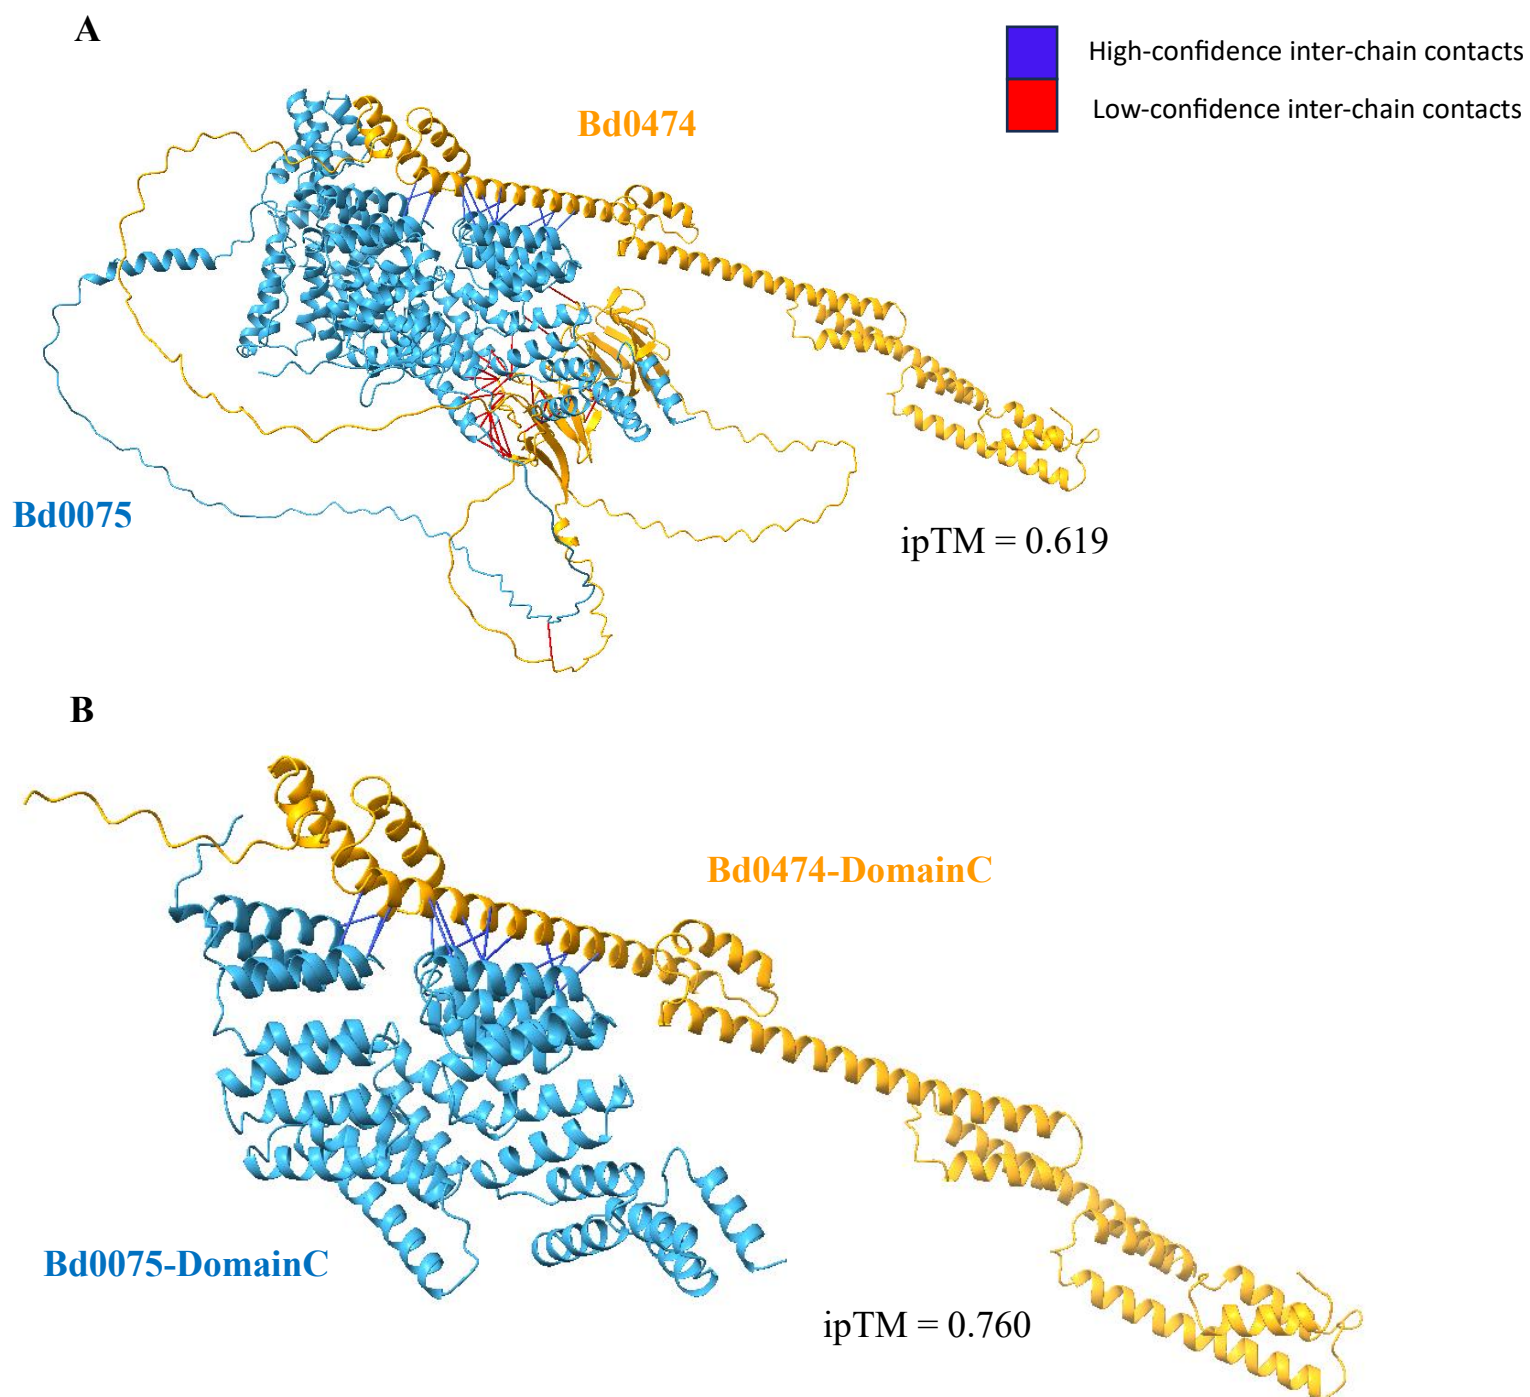

Figure. (A) Interaction model of Bd0075 and Bd0474. Blue lines indicate high-confident interactions while red lines indicate low-confidence (uncertain and unfavourable) interactions. Note that red lines in this model correspond to bonds between domains on different sides of the membrane and would be spatially unavailable for interaction. (B) Model showing Bd0075-DomainC and Bd0474-DomainC only.
